# Supplementary material
Source: publisher figshare collection journal article supplement (https://acs.figshare.com/ndownloader/files/8823580)
Supplement: Supplementary file 1 [file 8823580]

# **Large-Scale, Uniform and Superhydrophobic Titania Nanotubes at the Inner Surface of 1000-mm-Long Titanium Tubes**

Chengjie Xiang,<sup>1</sup> Lidong Sun,<sup>1,\*</sup> Ye Wang,<sup>1</sup> Guangchen Wang,<sup>1</sup> Xiaoli  
Zhao,<sup>1</sup> Sam Zhang<sup>2,\*</sup>

<sup>1</sup>State Key Laboratory of Mechanical Transmission, School of Materials Science  
and Engineering, Chongqing University, Chongqing 400044, PR China

<sup>2</sup>School of Mechanical and Aerospace Engineering, Nanyang Technological  
University, 50 Nanyang Avenue, Singapore 639798, Singapore

\*Corresponding authors

E-mail: [lidong.sun@cqu.edu.cn](mailto:lidong.sun@cqu.edu.cn) (*L. Sun*); [msyzhang@ntu.edu.sg](mailto:msyzhang@ntu.edu.sg) (*S. Zhang*)

## **Supporting Information**

**Movie Descriptions:**

**Movie S1.** Tailoring the wetting behaviors of the inner tube surface with different patterns. Left: Original Ti tubes; Middle: Nanostructure-patterned Ti tubes with TPFS; Right: Micro and nanostructure-patterned Ti tubes with TPFS.

**Movie S2.** The roll-off behavior of a water droplet at the untreated inner surface cut from a tubular substrate. The blue color originates from the  $\text{Cu}(\text{NO}_3)_2$  aqueous solution for better visualization.

**Movie S3.** The roll-off behavior of a water droplet at the inner superhydrophobic surface cut from a tubular substrate. The blue color originates from the  $\text{Cu}(\text{NO}_3)_2$  aqueous solution for better visualization.

**Movie S4.** The roll-off behavior of a glycerol droplet at the inner superhydrophobic surface cut from a tubular substrate.

**Movie S5.** A water droplet rolling back and forth at the inner superhydrophobic surface cut from a tubular substrate.

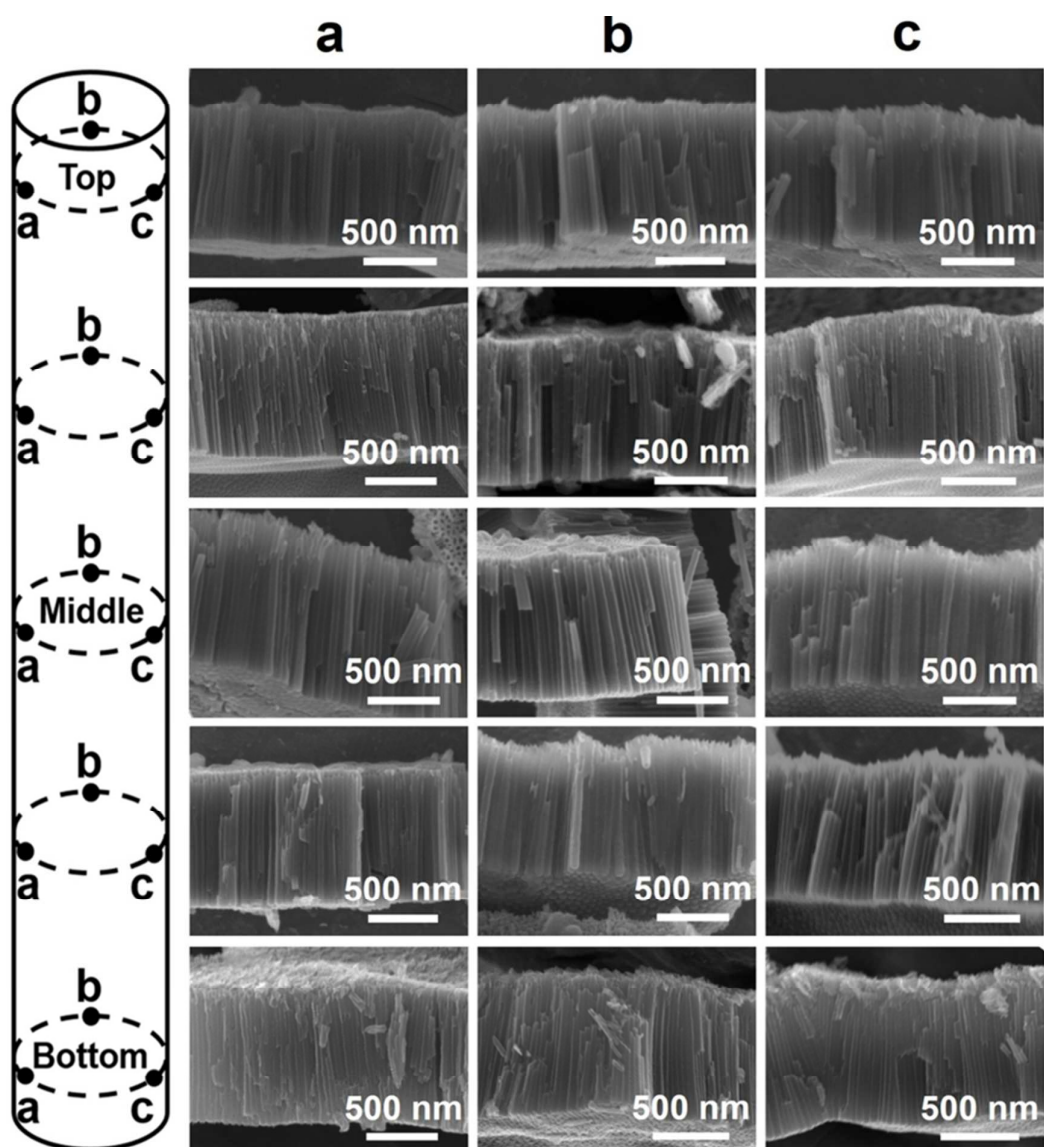

**Figure S1.** Typical cross-sectional FESEM images of anodic nanotubes at different positions of the inner surface on a titanium tubular electrode of 1000 mm in length.

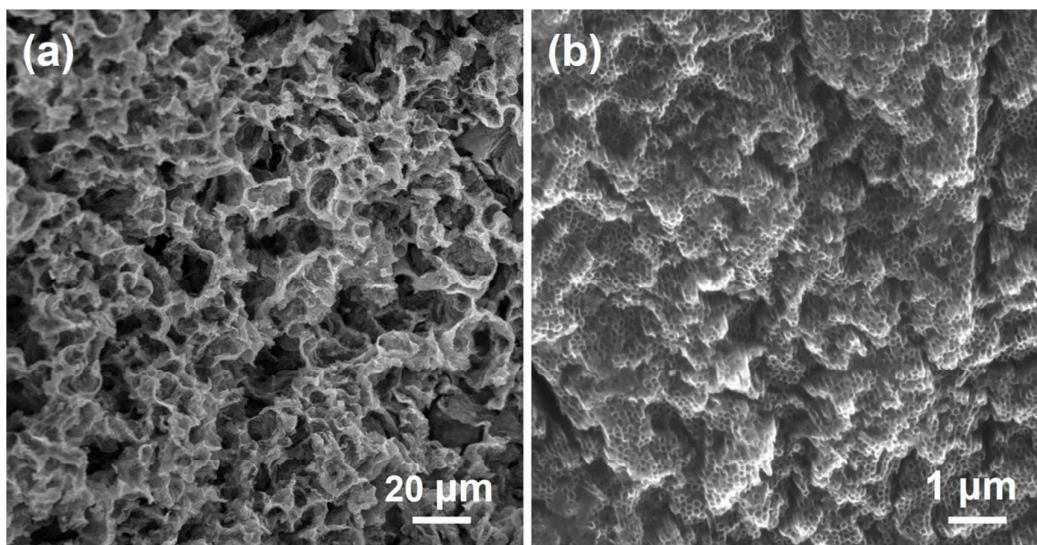

**Figure S2.** FESEM images of the microstructure obtained in the first anodization in NaCl solution (a), and the nanostructure formed on the above microstructure achieved in the second anodization in fluoride-containing ethylene glycol solution (b).
